# Supplementary material
Source: PubMed Central journal article supplement (PMC4793382)
Supplement: glov011003.w1_default.pdf [file glov011003.w1_default.pdf]

# Gloy et al. Meta-analysis bariatric surgery: Appendix

---

## ***List of Appendix Tables.***

|                                                                                       |    |
|---------------------------------------------------------------------------------------|----|
| Appendix Table 1 Search Strategy in MEDLINE via pubmed .....                          | 3  |
| Appendix Table 2 Search Strategy Embase (4 Dec 2012) .....                            | 5  |
| Appendix Table 3: Summary of ongoing trials .....                                     | 7  |
| Appendix Table 4: Definition of Type 2 diabetes and metabolic syndrome remission..... | 10 |
| Appendix Table 5: List of included studies and corresponding publications .....       | 10 |
| Appendix Table 6: Patient recruitment .....                                           | 12 |
| Appendix Table 7: Description of study groups .....                                   | 14 |
| Appendix Table 8: Summary on risk of bias assessment.....                             | 17 |
| Appendix Table 9: Adverse events .....                                                | 22 |

## **List of Appendix Figures**

|                                                                                                                                                                                                                              |    |
|------------------------------------------------------------------------------------------------------------------------------------------------------------------------------------------------------------------------------|----|
| Appendix Figure 1: Funnel plot .....                                                                                                                                                                                         | 26 |
| Appendix Figure 2: Body weight change after bariatric surgery versus non-surgical treatment (control) for patients (subgroups according to mean baseline BMI).....                                                           | 27 |
| Appendix Figure 3: Body weight change after bariatric surgery versus non-surgical treatment (control) for patients (subgroups according to bariatric surgery plus non-surgical treatment versus bariatric surgery).<br>..... | 27 |
| Appendix Figure 4: Change in FFM (A) and FM (B) after bariatric surgery versus non-surgical treatment (control) for obesity.....                                                                                             | 28 |
| Appendix Figure 5: Type 2 Diabetes Remission after bariatric surgery versus non-surgical treatment (control) for obesity (conservative case scenario). .....                                                                 | 29 |
| Appendix Figure 6: Metabolic Syndrome Remission after bariatric surgery versus non-surgical treatment (control) for obesity (conservative case scenario). .....                                                              | 29 |
| Appendix Figure 7: Change in systolic (A) and diastolic (B) blood pressure after bariatric surgery versus non-surgical treatment (control) for obesity. ....                                                                 | 30 |

Appendix Figure 8: Change of fasting glucose level after bariatric surgery versus non-surgical treatment (control) for obesity (diabetics only, subgroups according to AGB versus other bariatric surgery techniques)..... 31

Appendix Figure 9: Change of fasting glucose levels after bariatric surgery versus non-surgical treatment (control) for obesity (subgroups according to diabetics versus mixed populations)..... 31

Appendix Figure 10: Change of glycated HbA1c after bariatric surgery versus non-surgical treatment (control) for obesity (subgroups according to AGB versus other bariatric surgery techniques). ..... 32

#### Appendix Table 1 Search Strategy in MEDLINE via pubmed

1. "obesity"[MeSH Terms]
2. OR "obesity"[All Fields]
3. OR "obese"[All Fields]
4. OR "overweight"[MeSH Terms]
5. OR "overweight"[All Fields]
6. OR ("over"[All Fields] AND "weight"[All Fields])
7. OR "weight loss"[MeSH Terms]
8. OR ("weight"[All Fields] AND "loss"[All Fields])
9. OR "weight loss"[All Fields]
- 10. Or/1-9**
11. bariatric surgeries[All Fields]
12. OR bariatric surgery[All Fields]
13. OR bariatric surg\*[All Fields]
14. OR bariatric surgery[MeSH Terms]
15. OR "gastric bypass"[MeSH Terms]
16. OR ("gastric"[All Fields] AND "bypass"[All Fields])
17. OR "gastric bypass"[All Fields]
18. OR "digestive system surgical procedures"[MeSH Terms]
19. OR ("digestive"[All Fields] AND "system"[All Fields] AND "surgical"[All Fields] AND "procedures"[All Fields])
20. OR "digestive system surgical procedures"[All Fields]
21. OR ("gastrointestinal"[All Fields] AND "surgery"[All Fields])
22. OR "gastrointestinal surgery"[All Fields]
23. OR "biliopancreatic diversion"[MeSH Terms]
24. OR ("biliopancreatic"[All Fields] AND "diversion"[All Fields])
25. OR "biliopancreatic diversion"[All Fields]
26. OR ("gastric"[All Fields] AND banding[All Fields])
27. OR gastric band\*[All Fields]

28. OR LAGB[All Fields]
29. OR (lap[All Fields] AND band [All Fields])
30. OR "gastrectomy"[MeSH Terms]
31. OR "gastrectomy"[All Fields]
32. OR (malabsorptive[All Fields] AND "surgery"[Subheading])
33. OR (malabsorptive[All Fields] AND "surgery"[All Fields])
34. OR (malabsorptive[All Fields] AND "surgical procedures, operative"[MeSH Terms])
35. OR (malabsorptive[All Fields] AND "surgical"[All Fields] AND "procedures"[All Fields] AND "operative"[All Fields])
36. OR (malabsorptive[All Fields] AND "operative surgical procedures"[All Fields])
37. OR Roux en Y[All Fields]
38. OR (duodenal[All Fields] AND switch[All Fields])
- 39. OR/ 11-38**
40. randomized controlled trial [Publication Type]
41. OR randomized controlled trial [All Fields]
42. OR randomized [All Fields]
43. OR randomised [All Fields]
44. OR randomly [All Fields]
- 45. OR/ 40-44**
- 46. 10 AND 39 AND 45 AND "humans"[MeSH Terms]: 931**

Appendix Table 2 Search Strategy Embase (4 Dec 2012)

No. Query Results without updated results

#1 858

|       |                                                                                                                                                                                           |        |
|-------|-------------------------------------------------------------------------------------------------------------------------------------------------------------------------------------------|--------|
| #1.36 | #1.28 AND #1.33 AND #1.35 AND [humans]/lim AND [embase]/lim                                                                                                                               | 858    |
| #1.35 | #1.1 OR #1.2 OR #1.3 OR #1.4 OR #1.5 OR #1.6 OR #1.7 OR #1.8 OR #1.9 OR #1.10 OR #1.11 OR #1.12 OR #1.13 OR #1.14 OR #1.15 OR #1.16 OR #1.17 OR #1.18 OR #1.19 OR #1.20 OR #1.21 OR #1.34 | 158272 |
| #1.34 | gastric AND band*                                                                                                                                                                         | 7067   |
| #1.33 | #1.29 OR #1.30 OR #1.31 OR #1.32                                                                                                                                                          | 712654 |
| #1.32 | Randomly                                                                                                                                                                                  | 229732 |
| #1.31 | Randomised                                                                                                                                                                                | 73319  |
| #1.30 | Randomized                                                                                                                                                                                | 527454 |
| #1.29 | randomized AND controlled AND trial                                                                                                                                                       | 396285 |
| #1.28 | #1.22 OR #1.23 OR #1.24 OR #1.25 OR #1.26 OR #1.27                                                                                                                                        | 320394 |
| #1.27 | 'weight loss'/exp                                                                                                                                                                         | 79637  |
| #1.26 | 'weight'/exp AND loss                                                                                                                                                                     | 5443   |
| #1.25 | over AND 'weight'/exp                                                                                                                                                                     | 5927   |
| #1.24 | 'overweight'/exp                                                                                                                                                                          | 245747 |
| #1.23 | Obese                                                                                                                                                                                     | 89505  |
| #1.22 | 'obesity'/exp                                                                                                                                                                             | 245747 |
| #1.21 | duodenal AND switch                                                                                                                                                                       | 673    |
| #1.20 | 'roux en y'                                                                                                                                                                               | 7093   |
| #1.19 | roux AND en AND y                                                                                                                                                                         | 8352   |
| #1.18 | malabsorptive AND surgical AND 'procedures'/exp                                                                                                                                           | 389    |

No. Query

Results without updated results

|       |                                               |       |
|-------|-----------------------------------------------|-------|
| #1.17 | malabsorptive AND 'surgery'/exp               | 479   |
| #1.16 | 'gastrectomy'/exp                             | 34975 |
| #1.15 | lap AND band                                  | 539   |
| #1.14 | 'gastric banding'/exp                         | 3672  |
| #1.13 | Lagb                                          | 1009  |
| #1.12 | gastric AND banding                           | 4453  |
| #1.11 | biliopancreatic AND diversion                 | 986   |
| #1.10 | 'biliopancreatic diversion'/exp               | 1525  |
| #1.9  | 'gastrointestinal surgery':ab,ti              | 1676  |
| #1.8  | gastrointestinal AND 'surgery':ab,ti          | 93621 |
| #1.7  | digestive AND surgical AND 'procedures':ab,ti | 35859 |
| #1.6  | 'digestive system surgical procedures':ab,ti  | 0     |
| #1.5  | gastric AND bypass:ab,ti                      | 8144  |
| #1.4  | 'gastric bypass'/exp                          | 7859  |
| #1.3  | bariatric AND surg*:ab,ti                     | 11919 |
| #1.2  | 'bariatric surgery'/exp                       | 12988 |
| #1.1  | 'bariatric surgeries'                         | 156   |

Appendix Table 3: Summary of ongoing trials

| Trial ID                                                                      | Title                                                                                                                                                                                                 | intervention 1                                  | intervention 2                                                                                               | intervention 3                     | Status June 2012            | completion date | publication indexed |
|-------------------------------------------------------------------------------|-------------------------------------------------------------------------------------------------------------------------------------------------------------------------------------------------------|-------------------------------------------------|--------------------------------------------------------------------------------------------------------------|------------------------------------|-----------------------------|-----------------|---------------------|
| <a href="http://ClinicalTrials.gov/show/">http://ClinicalTrials.gov/show/</a> |                                                                                                                                                                                                       |                                                 |                                                                                                              |                                    |                             |                 |                     |
| NCT00939679                                                                   | ERGEM: Effect of Roux-en-Y Gastric Bypass Surgery on Energy Metabolism.                                                                                                                               | Roux-en-Y gastric bypass surgery                | low calorie diet (1,000 kcal/day)                                                                            | -                                  | ongoing, but not recruiting | April 2013*     | no                  |
| NCT01047735                                                                   | A Randomized Trial to Compare Surgical and Medical Treatments for Type 2 Diabetes                                                                                                                     | Roux-en-Y Gastric Bypass Surgery                | Laparoscopic Adjustable Gastric Banding                                                                      | Lifestyle Weight Loss Intervention | ongoing, but not recruiting | July 2011*      | no                  |
| NCT01197963                                                                   | A Surgical Approach to the Management of Type II Diabetes Mellitus in Patients With a BMI Between 25-35 kg/m <sup>2</sup>                                                                             | Sleeve Gastrectomy and Ileal transposition      | dietary and medical management                                                                               | -                                  | recruiting                  | December 2012*  | No                  |
| NCT01501201                                                                   | Comparison of Gastric By-Pass and Optimized Medical Treatment in Obese Diabetic Patients in Terms of Mortality, Glycemic Control, and Cost Effectiveness - Prospective, Multicenter, Randomized Study | laparoscopic Roux-en-Y Gastric Bypass (RYGBP)   | optimized medical management                                                                                 | -                                  | recruiting                  | September 2014* | No                  |
| NCT01278823                                                                   | Effect of Bariatric Surgery on Mechanisms of Type 2 Diabetes                                                                                                                                          | laparoscopic roux en y gastric bypass operation | medical management latest type 2 diabetes medications, lifestyle / behavior modification and dietary regimen | -                                  | recruiting                  | December 2013   | No                  |
| NCT01295229                                                                   | Feasibility, Efficacy, and Mechanisms of Surgical vs Medical Diabetes Treatment                                                                                                                       | laparoscopic Roux-en-Y gastric bypass (RYGB)    | Lifestyle Intervention                                                                                       | -                                  | recruiting                  | June 2012*      | no                  |
| NCT00641251                                                                   | Global Randomized Prospective Study of Intensive Medical Management of Type 2 Diabetes, With and Without Gastric Bypass Surgery                                                                       | intensive medical management                    | RYGB & intensive medical management                                                                          | -                                  | ongoing, but not recruiting | December 2013*  | Yes                 |
| NCT00428571                                                                   | Laparoscopic Bariatric Surgery for Treatment of Type 2 Diabetes in Obese Patients With End Organ Damage: A Prospective Randomized Controlled Pilot Study                                              | laparoscopic gastric bypass surgery             | laparoscopic adjustable gastric banding                                                                      | Intensive Medical Management       | recruiting                  | April 2013*     | no                  |
| NCT01041768                                                                   | Multicentric Prospective Randomized Controlled Trial on the Effect of Gastric Bypass and Biliopancreatic Diversion on Type 2 Diabetes Mellitus in Patients With BMI Between 30 and 35                 | Biliopancreatic diversion                       | gastric bypass                                                                                               | standard antidiabetic care         | recruiting                  | December 2010*  | no                  |

| Trial ID                                                                      | Title                                                                                                                                                                                                                                  | intervention 1                        | intervention 2                                               | intervention 3                                 | Status June 2012            | completion date | publication indexed |
|-------------------------------------------------------------------------------|----------------------------------------------------------------------------------------------------------------------------------------------------------------------------------------------------------------------------------------|---------------------------------------|--------------------------------------------------------------|------------------------------------------------|-----------------------------|-----------------|---------------------|
| <a href="http://ClinicalTrials.gov/show/">http://ClinicalTrials.gov/show/</a> |                                                                                                                                                                                                                                        |                                       |                                                              |                                                |                             |                 |                     |
| NCT00626964                                                                   | Prevention of Coro-ry Heart Disease in Morbidly Obese Patients. Lifestyle Intervention, Low Energy Diet or Bariatric Surgery                                                                                                           | Gastric Sleeve                        | Gastric bypass                                               | Intensive Lifestyle Intervention Program       | unknown                     | January 2011*   | no                  |
| NCT00888836                                                                   | Prospective Randomized Controlled Trial on the Effect of Gastric Bypass and Biliopancreatic Diversion on Type 2 Diabetes Mellitus in Patients With BMI > 35 vs. Medical Therapy                                                        | Gastric bypass                        | Bilio-pancreatic diversion                                   | anti-diabetic drugs and behavioral suggestions | completed                   | October 2011*   | Mingrone 2012       |
| NCT01231308                                                                   | Roux-en-Y-Gastric Bypass (RYGB) Versus Lifestyle Modification Plus Medical Therapy in the Treatment of Type 2 Diabetes in Overweight-to-Moderately Obese Patients: A Randomized Clinical Trial                                         | Roux-en-Y-Gastric Bypass              | Intensive lifestyle modification and Optimal medical Therapy | -                                              | recruiting                  | October 2013*   | no                  |
| NCT01352403                                                                   | Severe Obesity: Bariatric Surgery vs. Life-Style-Intervention Wurzburg Adipositas Study - WAS                                                                                                                                          | gastric bypass                        | intensive life style intervention                            | -                                              | recruiting                  | June 2016       | no                  |
| NCT00965302                                                                   | Sleeve Gastrectomy vs Medical Management for Remission of Diabetes in Mild to Moderately Obese Patients                                                                                                                                | Laparoscopic sleeve gastrectomy       | Intensive medical management                                 | -                                              | enrolling                   | April 2011*     | no                  |
| NCT00432809                                                                   | STAMPEDE: Surgical Therapy And Medications Potentially Eradicate Diabetes Efficiently                                                                                                                                                  | Advanced medical therapy for diabetes | P laparoscopic Roux-en-Y Gastric Bypass (RYGB)               | laparoscopic sleeve gastrectomy                | ongoing, but not recruiting | January 2012*   | Schauer 2012        |
| NCT01073020                                                                   | Surgery or Lifestyle With Intensive Medical Management in the Treatment of Type 2 Diabetes (SLIMM-T2D)                                                                                                                                 | Laparoscopic Adjustable Gastric Band  | Procedure: Roux-en-Y Gastric Bypass (Surgery)                | Intensive Medical Diabetes & Weight Management | recruiting                  | January 2013*   |                     |
| NCT01053130                                                                   | The Effect of Weight Loss Surgery on Preservation of Kidney Function and Cardiovascular Disease Risk Factors in Obese Patients With Stages 3-4 Chronic Kidney Disease: a Randomised Controlled Trial                                   | laparoscopic sleeve gastrectomy       | weight management program                                    | -                                              | recruiting                  | January 2012*   | no publication      |
| NCT01353066                                                                   | Multicenter Randomized Prospective Trial on the Effects of Intensive Medical Treatment of Type 2 Diabetes With and Without Roux-in-Y Gastric Bypass Surgery on Carotid Intima Media Thickness in Grade I Obesity (BMI 30,0-34,9 kg/m2) | Intensive Medical Treatment           | IMM+Roux-en-Y Gastric Bypass (RYGBP)                         | -                                              | Not yet open                | Not reported    | no publication      |



| Trial ID                                                                                                                                                                                                                                                                                                                                                                                                                                                                                                                   | Title | intervention 1 | intervention 2 | intervention 3 | Status<br>June 2012 | completion<br>date | publication<br>indexed |
|----------------------------------------------------------------------------------------------------------------------------------------------------------------------------------------------------------------------------------------------------------------------------------------------------------------------------------------------------------------------------------------------------------------------------------------------------------------------------------------------------------------------------|-------|----------------|----------------|----------------|---------------------|--------------------|------------------------|
| <a href="http://ClinicalTrials.gov/show/">http://ClinicalTrials.gov/show/</a>                                                                                                                                                                                                                                                                                                                                                                                                                                              |       |                |                |                |                     |                    |                        |
| <p>-Research Register: <a href="http://public.ukcrn.org.uk/search/">http://public.ukcrn.org.uk/search/</a> , Controlled Trials <a href="http://www.controlled-trials.com/">http://www.controlled-trials.com/</a>, EU Clinical Trials Register (EUCTR) (<a href="https://www.clinicaltrialsregister.eu/">https://www.clinicaltrialsregister.eu/</a>): No eligible ongoing trial found</p> <p>* Final data collection date for primary outcome measure</p> <p>- = not applicable, because no third intervention included</p> |       |                |                |                |                     |                    |                        |

Appendix Table 4: Definition of Type 2 diabetes and metabolic syndrome remission

| Diabetes remission                      |                                                                                                                                                                                                                                                                                                                                                                                                                                                                                                                                    |
|-----------------------------------------|------------------------------------------------------------------------------------------------------------------------------------------------------------------------------------------------------------------------------------------------------------------------------------------------------------------------------------------------------------------------------------------------------------------------------------------------------------------------------------------------------------------------------------|
| Study                                   | Definitions                                                                                                                                                                                                                                                                                                                                                                                                                                                                                                                        |
| Dixon 2008                              | = fasting plasma glucose $\leq$ 7mmol/L (126 mg/dL) and HbA1c $\leq$ 6.2% without medication ,                                                                                                                                                                                                                                                                                                                                                                                                                                     |
| Mingrone 2012                           | = fasting plasma glucose $\leq$ 5.6mmol/L and HbA1c $\leq$ 6.5% for one year without medication,                                                                                                                                                                                                                                                                                                                                                                                                                                   |
| Schauer 2012                            | = HbA1c $\leq$ 6% without diabetes medication.                                                                                                                                                                                                                                                                                                                                                                                                                                                                                     |
| Liang 2013                              | Not reported                                                                                                                                                                                                                                                                                                                                                                                                                                                                                                                       |
| Metabolic syndrome                      |                                                                                                                                                                                                                                                                                                                                                                                                                                                                                                                                    |
| Study                                   | Definitions                                                                                                                                                                                                                                                                                                                                                                                                                                                                                                                        |
| Dixon 2008, Dixon 2012 and O'Brien 2006 | defined by the US National Cholesterol Education Program Adult Treatment Panel III criteria. At least 3 of the following criteria had to be met: waist circumference $\geq$ 102 cm for men and $\geq$ 88 cm for women; triglycerides level: $\geq$ 150 mg/dL (1.7 mmol/L); high-density lipoprotein cholesterol: $\leq$ 40 mg/dL (1.04 mmol/L) in men and $\leq$ 50 mg/dL (1.29 mmol/L) in women; plasma pressure: systolic, $\geq$ 130 mmHg and diastolic, $\geq$ 85 mmHg; fasting plasma glucose: $\geq$ 110 mg/dL (6.1 mmol/L). |
| O'Brien 2010                            | defined metabolic syndrome by the age-specific adolescent criteria of Joliffe and Janssen (Joliffe and Janssen 2007) linked to the Adult Treatment Panel III21 criteria.                                                                                                                                                                                                                                                                                                                                                           |
| Schauer 2012                            | did not report a definition.                                                                                                                                                                                                                                                                                                                                                                                                                                                                                                       |

Appendix Table 5: List of included studies and corresponding publications

| Study identification | Reference                                                                                                                                                                                                                                                                                                                                                                                                                                             |
|----------------------|-------------------------------------------------------------------------------------------------------------------------------------------------------------------------------------------------------------------------------------------------------------------------------------------------------------------------------------------------------------------------------------------------------------------------------------------------------|
| Mingrone 2012        | Mingrone, G., S. Panunzi, et al. (2012). "Bariatric surgery versus conventional medical therapy for type 2 diabetes." <u>N Engl J Med</u> 366(17): 1577-1585.<br>Pokala, S. (2012). "Gastric bypass or biliopancreatic diversion increases remission from type 2 diabetes in obese adults." <u>Annals of Internal Medicine</u> 157(2): 2-12.                                                                                                          |
| Schauer 2012         | Schauer, P. R., S. R. Kashyap, et al. (2012). "Bariatric surgery versus intensive medical therapy in obese patients with diabetes." <u>N Engl J Med</u> 366(17): 1567-1576.                                                                                                                                                                                                                                                                           |
| Reis 2010            | Reis, L. O., W. J. Favaro, et al. (2010). "Erectile dysfunction and hormonal imbalance in morbidly obese male is reversed after gastric bypass surgery: A prospective randomized controlled trial." <u>International Journal of Andrology</u> 33(5): 736-744.                                                                                                                                                                                         |
| O'Brien 2006         | O'Brien, P. E., J. B. Dixon, et al. (2006). "Treatment of mild to moderate obesity with laparoscopic adjustable gastric banding or an intensive medical program: A randomized trial." <u>Annals of Internal Medicine</u> 144(9): 625-633.<br>Dixon, J. B., B. J. Strauss, et al. (2007). "Changes in body composition with weight loss: obese subjects randomized to surgical and medical programs." <u>Obesity (Silver Spring)</u> 15(5): 1187-1198. |
| Ikramuddin 2013      | Ikramuddin, S., J. Korner, et al. (2013). "Roux-en-Y gastric bypass vs intensive medical management for the control of type 2 diabetes, hypertension, and hyperlipidemia: the Diabetes Surgery Study randomized clinical trial." <u>JAMA</u> 309(21): 2240-2249.                                                                                                                                                                                      |
| Liang 2013           | Liang, Z., Q. Wu, et al. (2013). "Effect of laparoscopic Roux-en-Y gastric bypass surgery on type 2 diabetes mellitus with hypertension: A randomized controlled trial." <u>Diabetes Research and Clinical Practice</u> .                                                                                                                                                                                                                             |
| O'Brien 2010         | O'Brien, P. E., S. M. Sawyer, et al. (2010). "Laparoscopic adjustable gastric banding in severely obese adolescents: A randomized trial." <u>JAMA - Journal of</u>                                                                                                                                                                                                                                                                                    |

|                |                                                                                                                                                                                                                                                                                                                                                                                                                                                                                 |
|----------------|---------------------------------------------------------------------------------------------------------------------------------------------------------------------------------------------------------------------------------------------------------------------------------------------------------------------------------------------------------------------------------------------------------------------------------------------------------------------------------|
|                | <u>the American Medical Association</u> 303(6): 519-526.                                                                                                                                                                                                                                                                                                                                                                                                                        |
| Dixon 2008     | Dixon, J. B., P. E. O'Brien, et al. (2008). "Adjustable gastric banding and conventional therapy for type 2 diabetes: A randomized controlled trial." <u>Obstetrical and Gynecological Survey</u> 63(6): 372-373.                                                                                                                                                                                                                                                               |
| Dixon 2012     | Dixon, J., L. Schachter, et al. (2012). "Surgical versus conventional therapy for weight loss treatment of obstructive sleep apnea: A randomized controlled trial." <u>Obesity Research and Clinical Practice</u> 6: 29.<br>Dixon, J. B., L. M. Schachter, et al. (2012). "Surgical vs conventional therapy for weight loss treatment of obstructive sleep apnea: A randomized controlled trial." <u>JAMA - Journal of the American Medical Association</u> 308(11): 1142-1149. |
| Mingrone 2002  | Mingrone, G., A. V. Greco, et al. (2002). "Sex hormone-binding globulin levels and cardiovascular risk factors in morbidly obese subjects before and after weight reduction induced by diet or malabsorptive surgery." <u>Atherosclerosis</u> 161(2): 455-462.                                                                                                                                                                                                                  |
| Heindorff 1997 | Heindorff H, Hougaard K, Larsen PN. Laparoscopic adjustable gastric band increases weight loss compared to dietary treatment: A randomized study. <u>Obesity surgery</u> 1997;7(4):300-01.                                                                                                                                                                                                                                                                                      |

Appendix Table 6: Patient recruitment

| Study                  | Recruitment                                                                                                                                                                                                                         | Site                                                                                                                                                                   | Period                      | Patients assessed for eligibility (n) | Inclusion criteria                                                                                                                                                                                                                                                                                                                                                                                                                                                                                                                                                                                                   |
|------------------------|-------------------------------------------------------------------------------------------------------------------------------------------------------------------------------------------------------------------------------------|------------------------------------------------------------------------------------------------------------------------------------------------------------------------|-----------------------------|---------------------------------------|----------------------------------------------------------------------------------------------------------------------------------------------------------------------------------------------------------------------------------------------------------------------------------------------------------------------------------------------------------------------------------------------------------------------------------------------------------------------------------------------------------------------------------------------------------------------------------------------------------------------|
| <b>Mingrone 2012</b>   | Patients visiting the Catholic University anti-diabetic center in Rome, Italy                                                                                                                                                       | Day Hospital of Metabolic Diseases and Diabetology of the Catholic University of Rome, Italy                                                                           | April 2009 to October 2011  | 72                                    | Age 30 to 60 years, BMI 35 or more, a history of type 2 diabetes of at least 5 years, a glycated hemoglobin level of 7.0% or more                                                                                                                                                                                                                                                                                                                                                                                                                                                                                    |
| <b>Schauer 2012</b>    | Use of electronic medical records and advertisements in local media                                                                                                                                                                 | Cleveland Clinic, Cleveland, USA                                                                                                                                       | March 2007 to January 2011  | 218                                   | Age 20 to 60 years, BMI of 27 to 43, a diagnosis of type 2 diabetes (glycated hemoglobin level, >7.0%, uncontrolled)                                                                                                                                                                                                                                                                                                                                                                                                                                                                                                 |
| <b>Reis 2010</b>       | Selection from 117 men undergoing evaluation and follow-up for gastric bypass                                                                                                                                                       | University of Campinas, Sao Paulo, Brazil                                                                                                                              | First semester of 2007      | 117                                   | NR (only exclusion criteria given: Exclusion criteria were co-morbidities requiring regular drug usage (statin, antihypertensive, oral anti-diabetic), endocrine disease (except mild hypogonadism) or recent hormonal manipulation (thyroid / other hormonal reposition / block in the last 3 months), testicular impairment, previous history of alcohol or tobacco abuse and phosphodiesterase type-5 inhibitor usage.                                                                                                                                                                                            |
| <b>Ikramuddin 2013</b> | Recruitment of patients participating in a lifestyle and medically managed weight control program through mass media advertisements, contact with professional groups, presentations at public events and a practice based database | University of Minnesota, Columbia University Medical Center, National Taiwan University Hospital, Min Sheng General Hospital, Mayo Clinic in Rochester, USA and Taiwan | April 2008 to December 2011 | 2648                                  | Age 30 to 60 years, BMI > 28 in accordance with the WHO Asia-Pacific classification for obesity T2DM diagnosed according to WHO criteria, T2DM with hypertension of 5–10 years with hypertension defined as systolic blood pressure (SBP) ≥140 mmHg and/or diastolic (DBP) ≥90 mmHg as per 1999 WHO/ISH criteria; insulin therapy in combination with oral administration of drugs for 12 months; glycated hemoglobin (HbA1c) ≥ 7%; seronegative for antibodies against insulin, islet cells and glutamic acid decarboxylase (GAD), C-peptide level ≥ 0.3 mg/L.                                                      |
| <b>Liang 2013</b>      | NR                                                                                                                                                                                                                                  | Southwest Hospital of third military medical University in Chongqing , China                                                                                           | June 2008 to July 2011      | NR                                    | Age 30 to 67 years, BMI 30.0 to 39.9, under a physician's care for type 2 diabetes for at least 6 months before recruitment, had hemoglobin A1c (HbA1c) levels of 8.0% or higher at the time of entry, and had a serum C-peptide level higher than 1.0 ng/mL (to convert C-peptide to nanomoles per liter, multiply by 0.331) 90 minutes after a liquid mixed meal (250 calories, 6 g fat, 40 g carbohydrate, and 9 g protein), absence of conditions that would contraindicate surgery, such as serious cardiovascular disease, previous gastrointestinal surgery, psychological concerns, or history of malignancy |
| <b>O'Brien 2006</b>    | Newspaper advertisement                                                                                                                                                                                                             | Community Clinic Melbourne dedicated to obesity management or in the clinics of a university department of surgery.                                                    | May 2000 to November 2001   | 340                                   | Age 20 to 50 years; BMI of >30; identifiable problems, including an obesity-related comorbid condition; had attempted to reduce weight over at least the previous 5 years.                                                                                                                                                                                                                                                                                                                                                                                                                                           |

|                       |                                                                                                  |                                                                                                                                                                       |                                |     |                                                                                                                                                                                                                                                                                                                                                                                                                  |
|-----------------------|--------------------------------------------------------------------------------------------------|-----------------------------------------------------------------------------------------------------------------------------------------------------------------------|--------------------------------|-----|------------------------------------------------------------------------------------------------------------------------------------------------------------------------------------------------------------------------------------------------------------------------------------------------------------------------------------------------------------------------------------------------------------------|
| <b>O'Brien 2010</b>   | Newspaper advertisement                                                                          | Community Clinic of Melbourne or at a special clinic at the Centre for Adolescent Health, Royal Children's Hospital, Surgery at a private clinic, Melbourne Australia | May 2005 to September 2008     | 163 | Age 14 to 18 years; BMI >35; identifiable medical complications or psychosocial difficulties and evidence of attempts to lose weight by lifestyle means for more than 3 years.                                                                                                                                                                                                                                   |
| <b>Dixon 2008</b>     | Newspaper advertisement                                                                          | University Obesity Research Center, Melbourne Australia                                                                                                               | December 2002 to November 2004 | 158 | Age 20 to 60 years, BMI of 30 - 40, type 2 diabetes diagnoses within previous 2 years, no renal impairment or diabetic retinopathy                                                                                                                                                                                                                                                                               |
| <b>Dixon 2012</b>     | Potential participants were screened initially at sleep clinics and referred to trial physicians | 7 sleep clinics Melbourne, Australia                                                                                                                                  | September 2006 to March 2009   | 130 | Age 18 to 60 years, BMI 35 to 55, apnea-hypopnea index (AHI) of 20 events/hour or more diagnosed within the previous 6 months with recommendation to commence CPAP therapy and at least 3 prior significant weight loss attempts                                                                                                                                                                                 |
| <b>Mingrone 2002</b>  | NR                                                                                               | Istituto di Medicina Internae Geriatria, Universita` Cattolica del Sacro Cuore, Rome, Italy                                                                           | June 1998 to December 2000     | NR  | NR (only exclusion criteria given: pregnancy, history or diagnosis of diabetes, heart disease, hypertension, or other chronic diseases, hormone replacement therapy chronic steroid therapy, a history of alcohol abuse or drug abuse, and glucose intolerance, defined as a 2 h glucose levels of >140mg/dL after a 75g oral glucose load and of stable weight within plus minus 2 kg, 6 months before testing. |
| <b>Heindorff 1997</b> | NR                                                                                               | Department of Gastrointestinal Surgery, University Copenhagen                                                                                                         | October 1995 - 1996            | NR  | NR                                                                                                                                                                                                                                                                                                                                                                                                               |

Appendix Table 7: Description of study groups

| Study           | study groups (n) | Bariatric surgery group 1                                                                                                                                                                                                                                                                                                                                              | Bariatric surgery group 2                                                                                   | Non-surgical treatment group (control)                                                                                                                                                                                                                                                                                                                                                                                                                                                                                                                                                                                                                               |                                                                                                                                                                                                                                                                                                                                                                                     |                                                                                                                                                                                                    | Follow-up visits                                                                                                                    | Follow-up time |
|-----------------|------------------|------------------------------------------------------------------------------------------------------------------------------------------------------------------------------------------------------------------------------------------------------------------------------------------------------------------------------------------------------------------------|-------------------------------------------------------------------------------------------------------------|----------------------------------------------------------------------------------------------------------------------------------------------------------------------------------------------------------------------------------------------------------------------------------------------------------------------------------------------------------------------------------------------------------------------------------------------------------------------------------------------------------------------------------------------------------------------------------------------------------------------------------------------------------------------|-------------------------------------------------------------------------------------------------------------------------------------------------------------------------------------------------------------------------------------------------------------------------------------------------------------------------------------------------------------------------------------|----------------------------------------------------------------------------------------------------------------------------------------------------------------------------------------------------|-------------------------------------------------------------------------------------------------------------------------------------|----------------|
|                 |                  |                                                                                                                                                                                                                                                                                                                                                                        |                                                                                                             | In general                                                                                                                                                                                                                                                                                                                                                                                                                                                                                                                                                                                                                                                           | Diet                                                                                                                                                                                                                                                                                                                                                                                | physical activity                                                                                                                                                                                  |                                                                                                                                     |                |
| Mingrone 2012   | 3                | Laparoscopic RYGB; Daily multivitamin and mineral supplementation                                                                                                                                                                                                                                                                                                      | Open BPD; Daily multivitamin and mineral supplementation                                                    | Treatment by a diabetologist, dietician, and nurse; programs for diet and lifestyle modification                                                                                                                                                                                                                                                                                                                                                                                                                                                                                                                                                                     | Reduced energy and fat intake (<30% total fat)                                                                                                                                                                                                                                                                                                                                      | Increased (>30 minutes of brisk walking every day, possibly moderate intensity aerobic activity twice a week.                                                                                      | At months 1,3,6,9,12, and 24                                                                                                        | 2 years        |
| Schauer 2012    | 3                | Laparoscopic RYGB; Daily multivitamin and mineral supplementation; <b>+same therapy as non-surgical group</b>                                                                                                                                                                                                                                                          | Laparoscopic SG; Daily multivitamin and mineral supplementation; <b>+same therapy as non-surgical group</b> | Recommendations of the American Diabetes Association 2011 (weight management, lifestyle counseling, frequent home glucose monitoring, treatment by diabetes specialist, diabetes education, behavioral modification                                                                                                                                                                                                                                                                                                                                                                                                                                                  | Recommendations by the American Diabetes Association (American Diabetes 2011): either low-carbohydrate, low-fat calorie-restricted, or Mediterranean diets; encouraged to participate in the Weight Watchers program                                                                                                                                                                | > 150 min/week of moderate intensity aerobic physical activity (50–70% of maximum heart rate); in the absence of contraindications, encouraged to perform resistance training three times per week | Every 3 months                                                                                                                      | 1 year         |
| Reis 2010       | 2                | weight loss plan with nutritional education for low energy diet and intensive behaviour modification for daily physical activity guided by multidisciplinary team of nutritionist, physical educator, psychologist before and after surgery: distal gastrectomy involving three-quarters of the stomach with a 250–300 mL residual stump and Roux-en-Y reconstruction. | -                                                                                                           | general multidisciplinary team direction no intensive program                                                                                                                                                                                                                                                                                                                                                                                                                                                                                                                                                                                                        | general information about healthy food choices                                                                                                                                                                                                                                                                                                                                      | General guidance on increasing physical activity                                                                                                                                                   | At months 4 and 24                                                                                                                  | 2 years        |
| Ikramuddin 2013 | 2                | Laparoscopic RYGB, low-caloric diet with meal replacement 2 weeks before operation, Daily multi and mineral supplementation; <b>+same therapy as non-surgical group</b>                                                                                                                                                                                                | -                                                                                                           | The lifestyle-medical management protocol consisted of 2 components—lifestyle modification designed to produce maximum achievable weight loss and medications to control glycemia and cardiovascular disease risk factors while facilitating weight loss. Only US Food and Drug Administration–approved medications were used. Both groups met regularly with a trained interventionist to discuss strategies for facilitating weight management and increasing physical activity, including self-monitoring, stimulus control, problem solving, social support, cognitive behavior modification, recipe modification, eating away from home, and relapse prevention | All lifestyle/medical management participants were given calorie intake targets of 1200, 1500, or 1800 kilocalories per day, depending on body weight, with the goal of producing a weight loss of 1 to 2 pounds per week. Portion-controlled diets using meal replacements, structured menus, and calorie counting were encouraged to help participants stay within calorie limits | Both groups were advised to progressively increase their level of moderate-intensity physical activity (such as walking) to a total of 325 minutes per week                                        | 24 weekly meetings over the first 6 months, biweekly meetings between months 7 and 9, and monthly meetings between months 10 and 12 | 1 year         |

|                     |   |                                                                                                                                                                                                                                                              |   |                                                                                                                                                                                                                                       |                                                                                                                                                                                                                                                                                                                                                          |                                                                                                                                                                                                                                                                                                                                                                                                                           |                                                                                 |         |
|---------------------|---|--------------------------------------------------------------------------------------------------------------------------------------------------------------------------------------------------------------------------------------------------------------|---|---------------------------------------------------------------------------------------------------------------------------------------------------------------------------------------------------------------------------------------|----------------------------------------------------------------------------------------------------------------------------------------------------------------------------------------------------------------------------------------------------------------------------------------------------------------------------------------------------------|---------------------------------------------------------------------------------------------------------------------------------------------------------------------------------------------------------------------------------------------------------------------------------------------------------------------------------------------------------------------------------------------------------------------------|---------------------------------------------------------------------------------|---------|
| <b>Liang 2013</b>   | 3 | Laparoscopic RYGB,                                                                                                                                                                                                                                           | - | Usual care, treated by a multi-disciplinary team, individualized medical treatment with aim HbA1c<7%, blood pressure < 40/90mmHg, fat intake below 30%, second control group received Exenatide (Exendin-4, GLP-1 analogue) treatment | Nutritional goal based on an individual energy intake and reducing fat intake to <30%, saturated fat to <10% and increasing high fiber intake                                                                                                                                                                                                            | >30 min of brisk walking every day associated with moderate-intensity aerobic activity twice a week                                                                                                                                                                                                                                                                                                                       | At baseline, 3, 6, 9 and 12 months                                              | 1 year  |
| <b>O'Brien 2006</b> | 2 | LAGB; (Inamed, Santa Barbara, CA); lifestyle changes, good eating practices, increased physical activity                                                                                                                                                     | - | Behavioral modification, education and professional support on appropriate individualized eating and exercise behavior                                                                                                                | First 6-months: very-low-calorie diet (500 to 550 kcal/d) using Optifast (Novartis, Fremont, Michigan) daily for 12 weeks, followed by a transition phase over 4 weeks combining some very-low-calorie meals with 120 mg of orlistat, and then orlistat before all meals, followed by further courses of very-low-calorie diets or orlistat as tolerated | Exercise advice, no further details                                                                                                                                                                                                                                                                                                                                                                                       | Every 2 weeks during the very-low-calorie diet program, then every 4 to 6 weeks | 2 years |
| <b>O'Brien 2010</b> | 2 | LAGB (Allergan, Irvine, California); eating rules centered on having 3 or fewer small protein-containing meals per day, eaten slowly (1 min/ bite), at least 30 minutes of formal exercise per day and to maintain a high level of activity through the day. | - | Behavioral modification, parents were invited to participate in a specific educational program that included sports motivational talks, nutritional education, and discussions of the psychological aspects of adolescence            | Individualized diet plans ranging between 800 and 2000 kcal/d, depending on age and weight status                                                                                                                                                                                                                                                        | Increased, target of 10 000 steps per day on pedometer) with a structured exercise schedule of at least 30 minutes a day; decrease of sedentary activities with a limit of 2-hour computer or television screen time, increase of formal exercise including bicycle riding, walking, and swimming plus informal individual and group activities. A personal trainer was provided to each participant for a 6-week period. | Every 6 weeks                                                                   | 2 years |
| <b>Dixon 2008</b>   | 2 | LAGB (Inamed Health, Santa Barbara, CA);<br><b>+same therapy as non-surgical group</b>                                                                                                                                                                       | - | Open access to a general physician, dietician, nurse, diabetes educator, lifestyle modification program                                                                                                                               | Individualized diet plans to reduce intake of energy intake, fat (<30%) and saturated fats, recommendation of food intake with low glycemic index and high fiber foods, very low calorie diets and medications continued to be available and applied if appropriate                                                                                      | Increased, 10 000 steps per day and 200 minutes per week of structured activity including moderate intensity aerobic activity and resistance exercise                                                                                                                                                                                                                                                                     | Every 6 weeks                                                                   | 2 years |

|                       |       |                                                                       |   |                                                                                                                                                                                       |                                                                                                                                                                                                                                                                                                                              |                                                                                                                            |                                  |          |
|-----------------------|-------|-----------------------------------------------------------------------|---|---------------------------------------------------------------------------------------------------------------------------------------------------------------------------------------|------------------------------------------------------------------------------------------------------------------------------------------------------------------------------------------------------------------------------------------------------------------------------------------------------------------------------|----------------------------------------------------------------------------------------------------------------------------|----------------------------------|----------|
| <b>Dixon 2012</b>     | 2     | LAGB (Allergan Health);<br><b>+same therapy as non-surgical group</b> | - | Open access to a bariatric physician, sleep physician, and dietician, management of obstructive sleep apnea, dietary, physical activity, and behavioral programs were individualized. | Dietary Guidelines for Australian Adults and the Australian Guide to Healthy Eating; planned daily deficit of 500 kcal from estimated energy requirements; Initial very low –energy diet (Optifast, Nestle, Australia) program, with meal very low calorie diets continued to be available and used more or less intensively | Walking and 200 minutes/week of structured activity, including moderate-intensity aerobic activity and resistance exercise | Every 4 to 6 weeks               | 2 years  |
| <b>Mingrone 2002</b>  | 2 (4) | BPD                                                                   | - |                                                                                                                                                                                       | 20kcal/7kg fat free mass (FFM), 55% carbohydrates, 30% fat and 15% protein. The caloric content of the diet was modified every 6 months according to the DEXA measurement of FFM.                                                                                                                                            | Not reported                                                                                                               | Unclear, at least every 6 months | 2 years  |
| <b>Heindorff 1997</b> | 2     | LAGB                                                                  | - | Dietary treatment, no further details                                                                                                                                                 | Not reported                                                                                                                                                                                                                                                                                                                 | Not reported                                                                                                               | Every 4 weeks                    | 40 weeks |

Legend: FFM = fat-free mass; LAGB = Laparoscopic Adjustable Gastric Banding; RYGB = Roux-en-Y Gastric Bypass; SG = Sleeve Gastrectomy



Appendix Table 8: Summary on risk of bias assessment

| Study                                        |                                                                     | Mingrone 2012 | Schauer 2012 | Reis 2010   | O'Brien 2006   | Ikramuddin 2013 | Liang 2013     | O'Brien 2010   | Dixon 2008     | Dixon 2012     | Mingrone 2002 | Heindorff 1997 |
|----------------------------------------------|---------------------------------------------------------------------|---------------|--------------|-------------|----------------|-----------------|----------------|----------------|----------------|----------------|---------------|----------------|
| A) Risk of selection bias                    | Was the sequence generation adequate?                               | Yes           | Yes          | Yes         | Yes            | Yes             | Yes            | Yes            | Yes            | Yes            | Yes           | Unclear        |
|                                              | Was group allocation concealed?                                     | Yes           | Yes          | Yes         | Yes            | Yes             | Unclear        | Unclear        | Unclear        | Unclear        | Yes           | Unclear        |
|                                              | <b>Judgment</b>                                                     | <i>Low</i>    | <i>Low</i>   | <i>Low</i>  | <i>Low</i>     | <i>Low</i>      | <i>Unclear</i> | <i>Unclear</i> | <i>Unclear</i> | <i>Unclear</i> | <i>High</i>   | <i>Unclear</i> |
| B) Risk of performance bias                  | Blinding of patients                                                | No            | No           | No          | No             | No              | No             | No             | No             | No             | No            | No             |
|                                              | Blinding of health care providers                                   | No            | No           | No          | No             | No              | Unclear        | No             | No             | No             | No            | No             |
|                                              | <b>Judgment</b>                                                     | <i>High</i>   | <i>High</i>  | <i>High</i> | <i>High</i>    | <i>High</i>     | <i>High</i>    | <i>High</i>    | <i>High</i>    | <i>High</i>    | <i>High</i>   | <i>High</i>    |
| C) Risk of Detection bias (body weight loss) | Blinding of data collectors                                         | Yes           | No           | No          | Unclear        | Yes             | Unclear        | Unclear        | Unclear        | Unclear        | Yes           | <i>Unclear</i> |
|                                              | Blinding of outcome adjudicators                                    | Yes           | No           | No          | Unclear        | Yes             | Unclear        | Unclear        | Unclear        | Unclear        | Yes           | Unclear        |
|                                              | Blinding of data analysts                                           | Yes           | No           | No          | Unclear        | Unclear         | Unclear        | Unclear        | Unclear        | Unclear        | Yes           | Unclear        |
|                                              | <b>Judgment</b>                                                     | <i>Low</i>    | <i>High</i>  | <i>High</i> | <i>Unclear</i> | <i>Low</i>      | <i>Unclear</i> | <i>Unclear</i> | <i>Unclear</i> | <i>Unclear</i> | <i>Low</i>    | <i>Unclear</i> |
| D) Risk of attrition bias                    | Were all randomized patients analyzed?                              | No            | Yes          | Yes         | No             | Yes*            | No             | No             | Yes            | Yes            | Yes           | Yes            |
|                                              | Were patients analyzed in the groups to which they were randomized? | Yes           | Yes          | Yes         | Yes            | Yes             | Yes            | Yes            | Yes            | Yes            | low           | Yes            |

|  |                                                      |                                                                                                                                                                    |                                                                                                                                                                                                                                                          |                       |                                                                                                                                                                                                                                                                   |                                                                                                                                                                                                                                                                                                                |                                                                                                                                                                       |                                                                                                                                                                                                                                                                                           |                                                                                                                                                                                                                                                                                                                     |                                                                                                                                                    |                       |                               |
|--|------------------------------------------------------|--------------------------------------------------------------------------------------------------------------------------------------------------------------------|----------------------------------------------------------------------------------------------------------------------------------------------------------------------------------------------------------------------------------------------------------|-----------------------|-------------------------------------------------------------------------------------------------------------------------------------------------------------------------------------------------------------------------------------------------------------------|----------------------------------------------------------------------------------------------------------------------------------------------------------------------------------------------------------------------------------------------------------------------------------------------------------------|-----------------------------------------------------------------------------------------------------------------------------------------------------------------------|-------------------------------------------------------------------------------------------------------------------------------------------------------------------------------------------------------------------------------------------------------------------------------------------|---------------------------------------------------------------------------------------------------------------------------------------------------------------------------------------------------------------------------------------------------------------------------------------------------------------------|----------------------------------------------------------------------------------------------------------------------------------------------------|-----------------------|-------------------------------|
|  | Incomplete outcome data addressed? (continuous data) | Yes (incomplete outcome data was balanced across groups, non-surgical group: 1% of patients randomized were not analyzed and in the bariatric surgery group: 0.5%. | Yes (Missing data was addressed by last observation carried forward incomplete outcome data was: non-surgical group: 18% bariatric surgery group: 1% of patients randomized; reasons for missing outcome data were likely to be related to true outcome) | Yes (No missing data) | No (Missing data was not addressed in the analysis, in-complete outcome data was not balanced. Non-surgical treatment group: 18%, bariatric surgery group: 3% of patients randomized; reasons for missing outcome data were likely to be related to true outcome) | Yes* (missing data were imputed by multiple imputation for the data presented in the publication, but not for the data sent by email. Missing data was balanced across groups for body weight loss but not for other outcomes: non-surgical group: 5-13%, bariatric surgery group: 5%; of patients randomized) | No (Missing data was not addressed in the analysis. Missing data was not balanced across groups: Non-surgical group: 3% Bariatric surgery group: 14%, reasons unclear | No (Missing data was not addressed in the analysis, incomplete outcome data was not balanced across groups: non-surgical group: 28% of patients randomized were not analyzed and bariatric surgery group: 4%; reasons for missing outcome data were likely to be related to true outcome) | No (Baseline data carried forward analysis for missing data was used. This was not regarded as appropriate, Missing data: non-surgical group: 13%, bariatric surgery group: 3% of patients randomized . Thus this did not represent a conservative case scenario and is likely to overestimate the surgical effect) | Yes (missing data were imputed by multiple imputation, Missing data: non-surgical group: 13%, bariatric surgery group: 7%; of patients randomized) | yes (no missing data) | Yes (No missing outcome data) |
|  | <b>Judgment</b>                                      | <i>Low</i>                                                                                                                                                         | <i>Low</i>                                                                                                                                                                                                                                               | <i>Low</i>            | <i>High</i>                                                                                                                                                                                                                                                       | <i>Low</i>                                                                                                                                                                                                                                                                                                     | <i>Unclear</i>                                                                                                                                                        | <i>High</i>                                                                                                                                                                                                                                                                               | <i>High</i>                                                                                                                                                                                                                                                                                                         | <i>Low</i>                                                                                                                                         | <i>Low</i>            | <i>Low</i>                    |

|  |                                                          |                                                                                                                                                                                                 |                                                                                                                                                                                                                                                        |      |      |      |      |      |                                                                                                                                                                                                |                |             |             |
|--|----------------------------------------------------------|-------------------------------------------------------------------------------------------------------------------------------------------------------------------------------------------------|--------------------------------------------------------------------------------------------------------------------------------------------------------------------------------------------------------------------------------------------------------|------|------|------|------|------|------------------------------------------------------------------------------------------------------------------------------------------------------------------------------------------------|----------------|-------------|-------------|
|  | Incomplete outcome data addressed? (diabetes remission ) | Yes, to account for missing data, a conservative case scenario was assumed: all 2 missing patients in the non-surgical group achieved diabetes remission. However a risk ratio was not reported | Yes Missing data was addressed by last observation carried forward incomplete outcome data was: non-surgical group: 18% bariatric surgery group: 1% of patients randomized; reasons for missing outcome data were likely to be related to true outcome | n.a. | n.a. | n.a. | No   | n.a. | Yes To account for missing data, a conservative case scenario was assumed: all 4 missing patients in the non-surgical group achieved diabetes remission. However a risk ratio was not reported |                |             | n.a.        |
|  | <b>Judgment</b>                                          | <i>Low</i>                                                                                                                                                                                      | <i>Low</i>                                                                                                                                                                                                                                             | n.a. | n.a. | n.a. | High | n.a. | <i>Low</i>                                                                                                                                                                                     | <i>Unclear</i> | <i>n.a.</i> | <i>n.a.</i> |

|                                  |                                                                          |      |                                                                                                                                                                                                                                                              |                                              |                                                                                                              |             |                                                         |                                                                                                              |                                                                                                              |                                                         |                                                                         |      |
|----------------------------------|--------------------------------------------------------------------------|------|--------------------------------------------------------------------------------------------------------------------------------------------------------------------------------------------------------------------------------------------------------------|----------------------------------------------|--------------------------------------------------------------------------------------------------------------|-------------|---------------------------------------------------------|--------------------------------------------------------------------------------------------------------------|--------------------------------------------------------------------------------------------------------------|---------------------------------------------------------|-------------------------------------------------------------------------|------|
|                                  | Incomplete outcome data addressed? <b>(Metabolic syndrome remission)</b> | n.a. | Yes<br>Missing data was addressed by last observation carried forward<br>incomplete outcome data was: non-surgical group: 18% bariatric surgery group: 1% of patients randomized; reasons for missing outcome data were likely to be related to true outcome | n.a.                                         | No<br>Missing data was not addressed in the analysis, incomplete outcome data was not balanced across groups | n.a.        | n.a.                                                    | No<br>Missing data was not addressed in the analysis, incomplete outcome data was not balanced across groups | No<br>Missing data was not addressed in the analysis, incomplete outcome data was not balanced across groups | Yes<br>missing data were imputed by multiple imputation | n.a.                                                                    | n.a. |
|                                  | <b>Judgment</b>                                                          | n.a. | <i>Low</i>                                                                                                                                                                                                                                                   | n.a.                                         | <i>High</i>                                                                                                  | <i>n.a.</i> | <i>n.a.</i>                                             | <i>High</i>                                                                                                  | <i>High</i>                                                                                                  | <i>Low</i>                                              | n.a.                                                                    | n.a. |
| <b>E) Risk of reporting bias</b> | Were expected outcomes reported or outcomes addressed pre-specified?     | Yes  | Yes                                                                                                                                                                                                                                                          | Unclear, adverse events were poorly reported | Yes                                                                                                          | Yes         | Unclear, adverse events were poorly reported;           | yes                                                                                                          | Yes                                                                                                          | Yes                                                     | No adverse events were not reported in the publication but upon request | No   |
|                                  | Are exact data available? <b>(body weight loss)</b>                      | Yes  | Yes                                                                                                                                                                                                                                                          | Yes                                          | Yes                                                                                                          | Yes         | No, body weight at the end of follow up is not reported | yes                                                                                                          | Yes                                                                                                          | Yes                                                     | Yes                                                                     | Yes  |

|                        |                                            |                                                                                                                     |                                                                                                                     |                                                                    |                                                                                                                                                                                             |                       |                                                          |                                                                        |                                                                                                                                                                                                            |                       |                                                   |                                                                              |
|------------------------|--------------------------------------------|---------------------------------------------------------------------------------------------------------------------|---------------------------------------------------------------------------------------------------------------------|--------------------------------------------------------------------|---------------------------------------------------------------------------------------------------------------------------------------------------------------------------------------------|-----------------------|----------------------------------------------------------|------------------------------------------------------------------------|------------------------------------------------------------------------------------------------------------------------------------------------------------------------------------------------------------|-----------------------|---------------------------------------------------|------------------------------------------------------------------------------|
|                        | Are exact data available? (other outcomes) | One year data was not reported for most data, except for glycated HBA1c, which is however only presented in figure. | Yes                                                                                                                 | Yes                                                                | Quality of life data only presented in figure, meaning no point estimates are available for this outcome; numbers for relative change in body weight in table differs from numbers in text. | Yes                   | Yes                                                      | Quality of life data only presented in figure, no exact data available | No (loss of excess body weight: measure of variance only presented in figure; BMI baseline values in table different from text on p. 319 "weight loss"; no measure of variance given for BMI at 24 months) | yes                   | yes                                               | n.a.                                                                         |
|                        | <b>Judgment</b>                            | <i>Low</i>                                                                                                          | <i>Low</i>                                                                                                          | <i>Low</i>                                                         | <i>Low</i>                                                                                                                                                                                  | <i>Low</i>            | <i>Low</i>                                               | <i>Low</i>                                                             | <i>Low</i>                                                                                                                                                                                                 | <i>Low</i>            | <i>Low</i>                                        | <i>Low</i>                                                                   |
| F) Other forms of bias | Funding                                    | Mixed industry/public                                                                                               | Mixed industry/public                                                                                               | Not reported                                                       | Mixed industry/public                                                                                                                                                                       | Mixed industry/public | Public                                                   | Mixed industry/public                                                  | Mixed industry/public                                                                                                                                                                                      | Mixed industry/public | public                                            | NR                                                                           |
|                        | Other                                      | No other                                                                                                            | yes, block randomization was used in an unblinded trial which can mean it is possible to predict future assignments | Unclear selection criteria of patients, unclear inclusion criteria | Yes, less than half of the patients assessed for eligibility were finally included                                                                                                          | No                    | Unclear, how many patients were assessed for eligibility | No other                                                               | Yes, block randomization was used in an unblinded trial which can mean it is possible to predict future assignments                                                                                        | No other              | Yes, recruitment of patients was poorly described | Due to lack of full text publication, information was unclear for most items |

\*for data in the publication yes, but not for data additionally obtained.

Appendix Table 9: Adverse events

| Study                      | Mingrone 2012 |     |      | Schauer 2012 |      |    | Ikramuddin 2013 |                                  | Liang 2013 |           |      | O'Brian 2006 |     | O'Brian 2010 |     | Dixon 2008 |         | Dixon 2012 |     | Mingrone 2002 |     | Heindorff 1997 |      |
|----------------------------|---------------|-----|------|--------------|------|----|-----------------|----------------------------------|------------|-----------|------|--------------|-----|--------------|-----|------------|---------|------------|-----|---------------|-----|----------------|------|
| Study group                | control       | BPD | RYGB | control      | RYGB | SG | control         | RYGB                             | control 1  | control 2 | RYGB | control      | AGB | control      | AGB | AGB        | control | control    | AGB | control       | BPD | control        | LAGB |
| Patients (n)               | 20            | 19  | 19   | 43           | 50   | 49 | 60              | 60                               | 36         | 34        | 31   | 31           | 39  | 25           | 25  | 30         | 30      | 30         | 30  | 33            | 46  | 8              | 8    |
| Acute abdomen              |               |     |      |              |      |    |                 |                                  |            |           |      |              |     |              |     |            |         | 1          |     |               |     |                |      |
| Anastomotic ulcer          |               |     |      |              | 4    |    |                 |                                  |            |           |      |              |     |              |     |            |         |            |     |               |     |                |      |
| Anoxic brain injury        |               |     |      |              |      |    | 0               | 1                                |            |           |      |              |     |              |     |            |         |            |     |               |     |                |      |
| Angina                     |               |     |      |              |      |    |                 |                                  |            |           |      |              |     |              |     |            | 1       | 1          |     |               |     |                |      |
| Arrhythmia or palpitations |               |     |      | 2            |      | 1  |                 |                                  |            |           |      |              |     |              |     |            |         |            |     |               |     |                |      |
| Band removed               |               |     |      |              |      |    |                 |                                  |            |           |      |              |     |              |     | 1          |         |            |     |               |     |                |      |
| Bleeding                   |               |     |      |              |      |    |                 | 1, anastomotic ulcer; 1, uterine |            |           |      |              |     |              |     |            |         |            |     |               |     |                |      |
| Blood transfusion needed   |               |     |      |              | 1    | 1  |                 |                                  |            |           |      |              |     |              |     |            |         |            |     |               |     |                |      |
| Bronchitis                 |               |     |      |              |      |    | 1               | 0                                |            |           |      |              |     |              |     |            |         |            |     |               |     |                |      |
| Buttock abscess            |               |     |      |              |      |    |                 |                                  |            |           |      |              |     |              |     |            |         |            |     |               |     |                |      |
| Cardiac and renal failure  |               |     |      |              |      |    |                 |                                  |            |           |      |              |     |              |     |            |         | 1          |     |               |     |                |      |
| Cataract                   |               |     |      |              |      |    | 0               | 1                                |            |           |      |              |     |              |     |            |         |            |     |               |     |                |      |
| Cellulitis                 |               |     |      | 1            |      |    |                 |                                  |            |           |      |              |     |              |     |            |         |            |     |               |     |                |      |
| Cholecystectomy            |               |     |      |              | 1    |    |                 |                                  |            |           |      | 4            | 1   | 1            | 1   |            |         |            | 1   |               |     |                |      |
| Depression                 |               |     |      |              |      |    |                 |                                  |            |           |      |              |     | 1            | 1   |            |         | 1          |     |               |     |                |      |

|                                                   |  |   |   |    |    |    |   |                        |  |  |  |   |  |   |   |   |   |   |              |  |  |  |
|---------------------------------------------------|--|---|---|----|----|----|---|------------------------|--|--|--|---|--|---|---|---|---|---|--------------|--|--|--|
| Diarrhea                                          |  |   |   |    |    |    | 0 | 1                      |  |  |  | 1 |  |   |   | 1 | 2 |   |              |  |  |  |
| Duodenal ulcer                                    |  |   |   |    |    |    |   |                        |  |  |  |   |  |   |   |   |   | 1 |              |  |  |  |
| Duodenitis                                        |  |   |   |    |    |    | 1 | 0                      |  |  |  |   |  |   |   |   |   |   |              |  |  |  |
| Excessive weight gain                             |  |   |   | 3  |    |    |   |                        |  |  |  |   |  |   |   |   |   |   |              |  |  |  |
| Epilepsy                                          |  |   |   |    |    |    |   |                        |  |  |  |   |  |   |   |   |   |   | 1            |  |  |  |
| Febrile episodes                                  |  |   |   |    |    |    |   |                        |  |  |  |   |  | 1 |   |   |   |   |              |  |  |  |
| Gastric pouch enlargement                         |  |   |   |    |    |    |   |                        |  |  |  |   |  | 6 | 2 |   |   |   | 1            |  |  |  |
| Gastritis                                         |  |   |   |    |    |    |   | 1                      |  |  |  |   |  |   |   |   |   |   |              |  |  |  |
| Gastrointestinal leak                             |  |   |   |    |    | 1  |   | 2,<br>Anastomotic leak |  |  |  |   |  |   |   |   |   |   |              |  |  |  |
| Headache                                          |  |   |   |    |    |    | 0 | 1                      |  |  |  |   |  |   |   |   |   |   | 1,<br>severe |  |  |  |
| Hemoglobin decrease > 5g/dL                       |  |   |   |    | 1  |    |   |                        |  |  |  |   |  |   |   |   |   |   |              |  |  |  |
| Hernia                                            |  | 1 |   |    | 1  |    |   |                        |  |  |  |   |  |   |   |   |   |   | 1            |  |  |  |
| Hyper-triglyceridemia                             |  |   |   |    |    |    | 5 | 1                      |  |  |  |   |  |   |   |   |   |   |              |  |  |  |
| Hypo-albuminemia                                  |  | 2 |   |    |    |    | 0 | 4                      |  |  |  |   |  |   |   |   |   |   |              |  |  |  |
| Hypoglycemic episode                              |  |   |   | 35 | 28 | 39 | 4 | 5                      |  |  |  |   |  |   | 1 | 1 |   |   |              |  |  |  |
| Hypokalemia                                       |  |   |   | 1  | 2  | 2  |   |                        |  |  |  |   |  |   |   |   |   |   |              |  |  |  |
| Intestinal occlusion                              |  |   | 1 |    |    |    |   |                        |  |  |  |   |  |   |   |   |   |   |              |  |  |  |
| Intolerance to metformin                          |  |   |   |    |    |    |   |                        |  |  |  |   |  |   | 1 | 3 |   |   |              |  |  |  |
| intolerance to orlistat                           |  |   |   |    |    |    |   |                        |  |  |  | 8 |  |   |   |   |   |   |              |  |  |  |
| Intravenous treatment for dehydration/dehydration |  |   |   |    | 4  | 2  | 0 | 1                      |  |  |  |   |  |   |   |   |   |   | 1            |  |  |  |





|                                    |  |  |  |  |   |  |   |    |   |    |   |  |   |  |  |   |   |  |  |  |  |  |  |  |
|------------------------------------|--|--|--|--|---|--|---|----|---|----|---|--|---|--|--|---|---|--|--|--|--|--|--|--|
| Vasculitic rash                    |  |  |  |  |   |  |   |    |   |    |   |  |   |  |  |   | 1 |  |  |  |  |  |  |  |
| Vitamin-deficiencies<br>(B and D)  |  |  |  |  |   |  | 7 | 15 |   |    |   |  |   |  |  |   |   |  |  |  |  |  |  |  |
| Vomiting/nausea                    |  |  |  |  |   |  |   |    | 3 | 13 | 5 |  |   |  |  |   |   |  |  |  |  |  |  |  |
| Wound /5 mm port<br>site infection |  |  |  |  | 1 |  |   | 1  |   |    | 6 |  | 1 |  |  | 1 |   |  |  |  |  |  |  |  |
| Wound hematoma                     |  |  |  |  |   |  |   | 1  |   |    |   |  |   |  |  |   |   |  |  |  |  |  |  |  |

# Risk of bias across studies

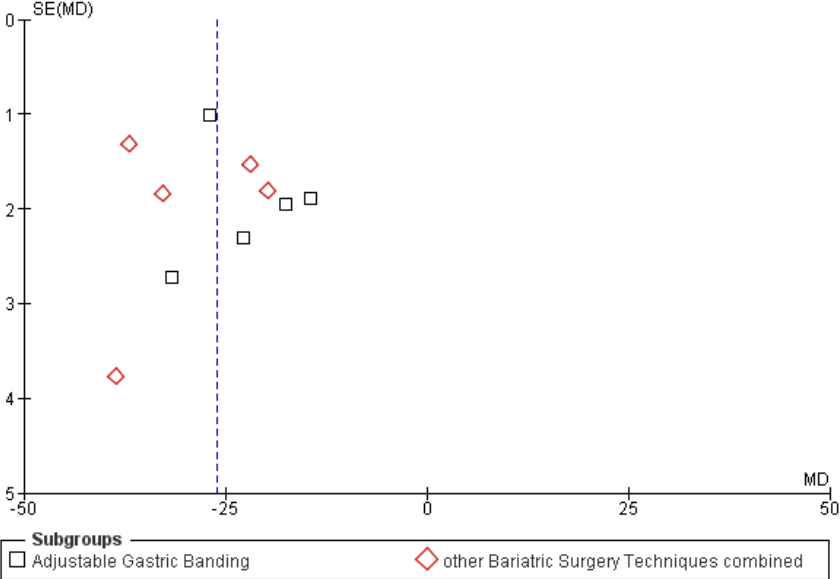

Appendix Figure 1: Funnel plot

# Body weight, body composition

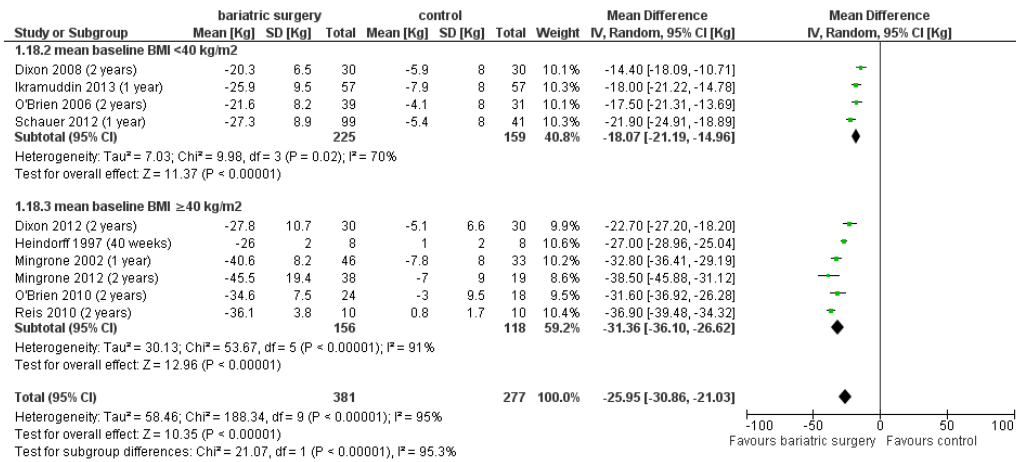

**Appendix Figure 2: Body weight change after bariatric surgery versus non-surgical treatment (control) for patients (subgroups according to mean baseline BMI).**

A subgroup analysis was done for the studies which included patients with a mean body mass index (BMI) < 40 at baseline compared to studies which included patients with a mean BMI ≥ 40 at baseline. Standard deviations (SD) were derived from 95% CI for O'Brien 2010 and Dixon 2012, and were imputed by taking the median SD of the respective groups of the other studies for O'Brien 2006 and Mingrone 2002. Abbreviations: BPD = biliopancreatic diversion, CI = confidence interval, df = degrees of freedom, I<sup>2</sup> = measure of inconsistency (scale: 0 to 100%), IV = Inverse Variance Statistical Method, Random = random effects model, RYGB = Roux-en-Y gastric bypass, SG = sleeve gastrectomy).

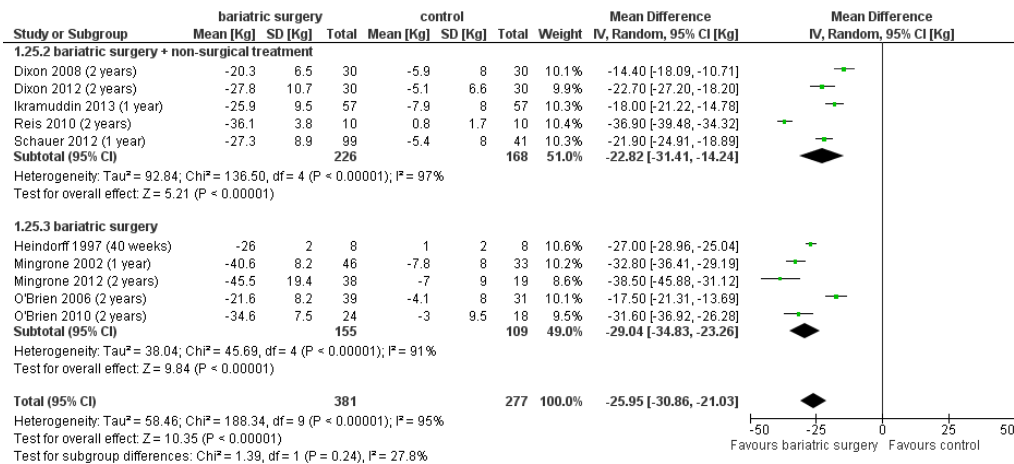

**Appendix Figure 3: Body weight change after bariatric surgery versus non-surgical treatment (control) for patients (subgroups according to bariatric surgery plus non-surgical treatment versus bariatric surgery).**

A subgroup analysis was done for the studies which offered the treatment of the non-surgical treatment group to the bariatric surgery group as well versus studies which offered none or some other accompanying treatment in the bariatric surgery group. Standard deviations (SD) were derived from the 95% CI for O'Brien 2010 and Dixon 2012, and were imputed by taking the median SD of the respective groups of the other studies for O'Brien 2006 and Mingrone 2002. Abbreviations: BPD = biliopancreatic diversion, CI = confidence interval, df = degrees of freedom, I<sup>2</sup> = measure of inconsistency (scale: 0 to 100%), IV = Inverse Variance Statistical Method, Random = random effects model, RYGB = Roux-en-Y gastric bypass, SG = sleeve gastrectomy).

A)

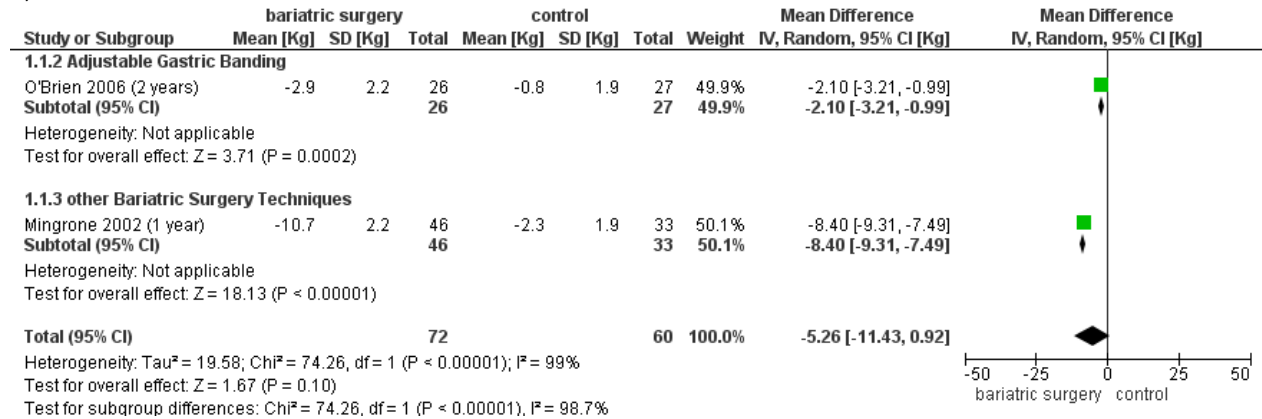

B)

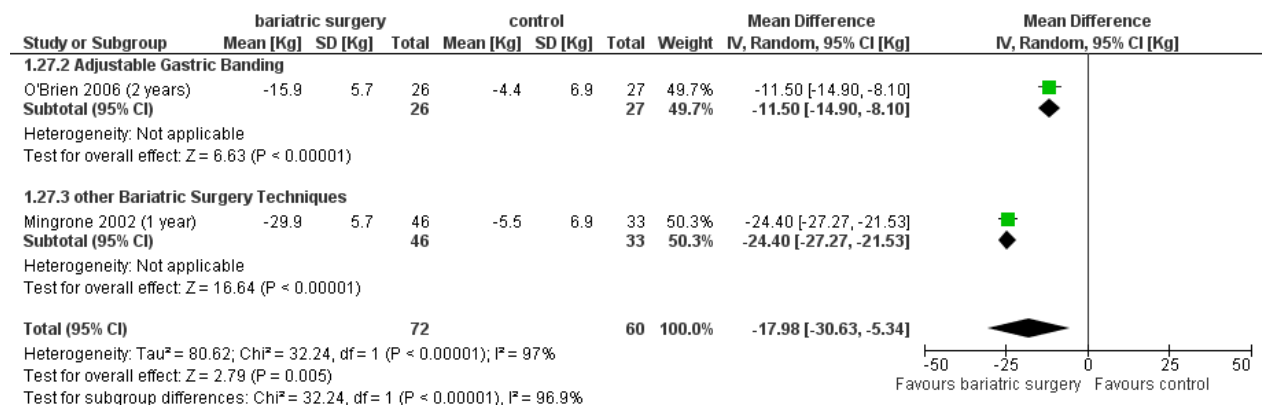

Appendix Figure 4: Change in FFM (A) and FM (B) after bariatric surgery versus non-surgical treatment (control) for obesity.

A subgroup analysis was done for the studies which used AGB versus other bariatric surgery techniques (BPD). FFM and FM were estimated with Dual-X-Ray Absorptiometry (DEXA). Data for O'Brien 2006 was taken from another publication of the same study, but with more missing data (Dixon 2007) for Mingrone 2002 the same SD was assumed. The total DEXA weight loss was  $-18.8 \pm 6.1$  and  $-5.1 \pm 7.7$  in O'Brien 2006 and  $-40.6$  and  $-7.8$  Kg in Mingrone 2002 for the bariatric surgery versus non-surgical treatment group, respectively.

Abbreviations: BPD = biliopancreatic diversion, CI = confidence interval, df = degrees of freedom, FFM = fat-free mass, FM = Fat mass, I<sup>2</sup> = measure of inconsistency (scale: 0 to 100%), IV = Inverse Variance Statistical Method, Random = random effects model, RYGB = Roux-en-Y gastric bypass, SG = sleeve gastrectomy).

# Diabetes and metabolic syndrome remission

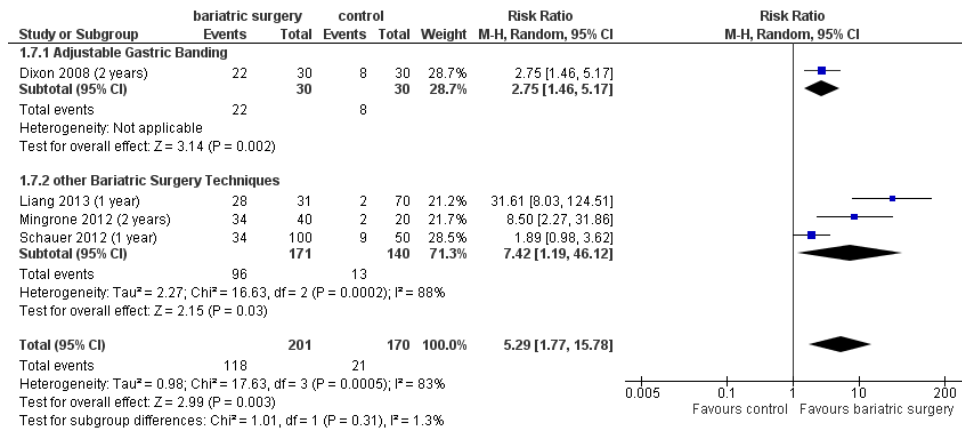

Appendix Figure 5: Type 2 Diabetes Remission after bariatric surgery versus non-surgical treatment (control) for obesity (conservative case scenario).

A subgroup analysis was done for the studies which used AGB versus other bariatric surgery techniques (RYGB, SG or BPD). For the pooled analysis a conservative case scenario was assumed. All missing patients in the non-surgical treatment groups were treated as if they had achieved diabetes remission (n = 20), whereas missing patients in the bariatric surgery groups did not. Abbreviations: BPD = biliopancreatic diversion, CI = confidence interval, df = degrees of freedom, I<sup>2</sup> = measure of inconsistency (scale: 0 to 100%), M-H = Mantel-Haenszel Statistical Method, Random = random effects model, RYGB = Roux-en-Y gastric bypass, SG = sleeve gastrectomy).

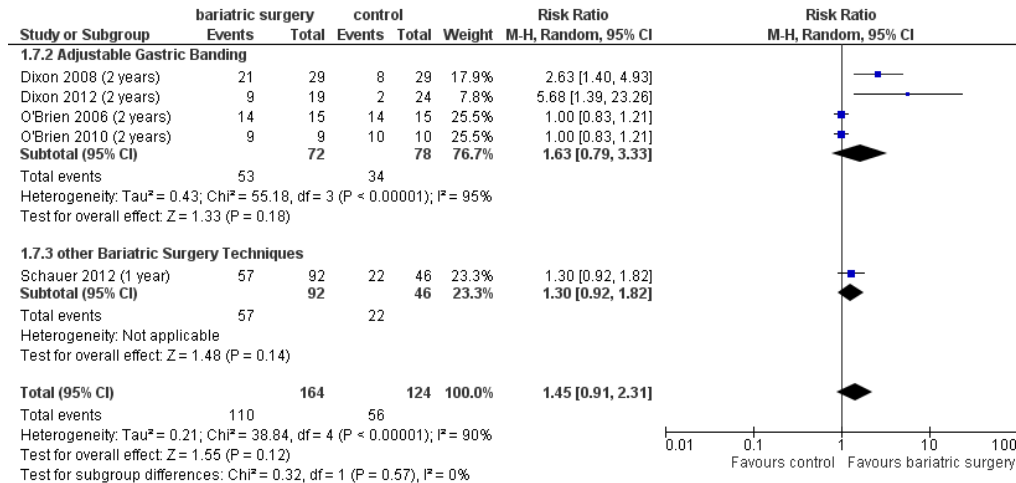

Appendix Figure 6: Metabolic Syndrome Remission after bariatric surgery versus non-surgical treatment (control) for obesity (conservative case scenario).

For the pooled analysis a conservative case scenario was assumed. A subgroup analysis was done for the studies which used AGB versus other bariatric surgery techniques (RYGB, SG or BPD). All missing patients in the non-surgical treatment groups were treated as if they had achieved metabolic syndrome remission (n = 24), whereas missing patients in the bariatric surgery groups did not.

Abbreviations: BPD = biliopancreatic diversion, CI = confidence interval, df = degrees of freedom, I<sup>2</sup> = measure of inconsistency (scale: 0 to 100%), M-H = Mantel-Haenszel Statistical Method, Random = random effects model, RYGB = Roux-en-Y gastric bypass, SG = sleeve gastrectomy).

# Blood parameters and blood pressure

A)

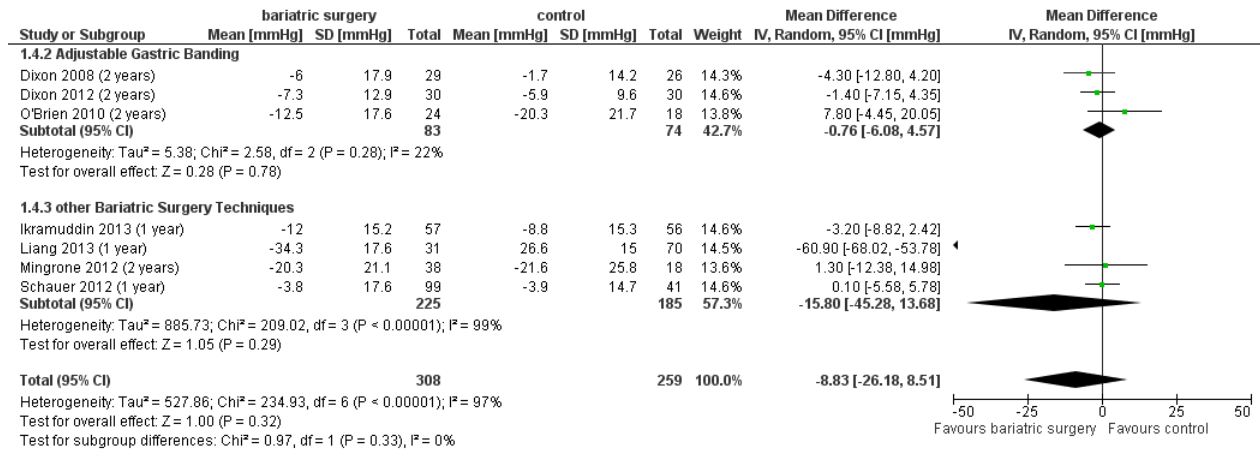

B)

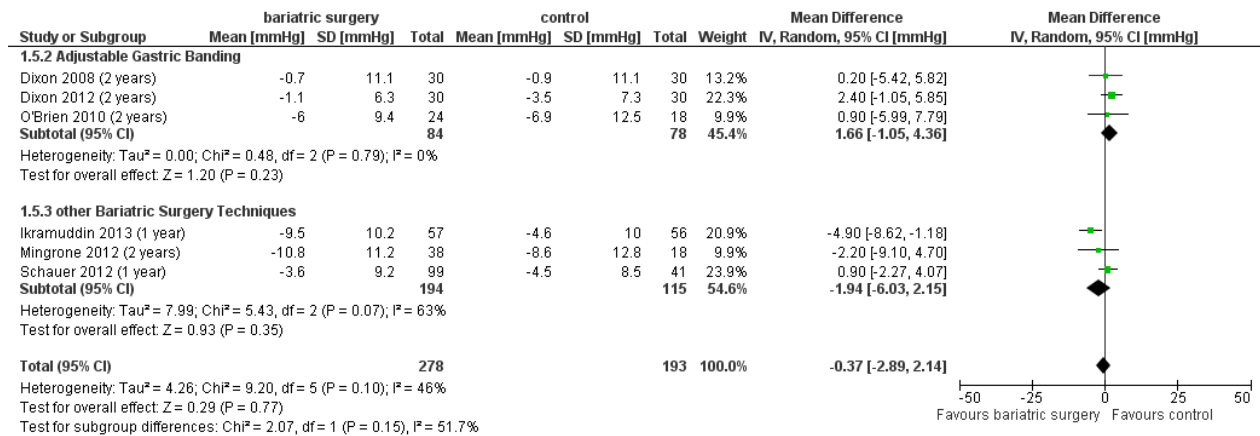

Appendix Figure 7: Change in systolic (A) and diastolic (B) blood pressure after bariatric surgery versus non-surgical treatment (control) for obesity.

A subgroup analysis was done for the studies which used AGB other bariatric surgery techniques (RYGB, SG, or BPD). Standard deviations (SD) were derived from 95% CI for Dixon 2012 and were imputed by taking the median SD of the respective groups of the other studies for Liang 2013.

Abbreviations: BPD = biliopancreatic diversion, CI = confidence interval, df = degrees of freedom, I<sup>2</sup> = measure of inconsistency (scale: 0 to 100%), IV = Inverse Variance Statistical Method, Random = random effects model, RYGB = Roux-en-Y gastric bypass, SG = sleeve gastrectomy).

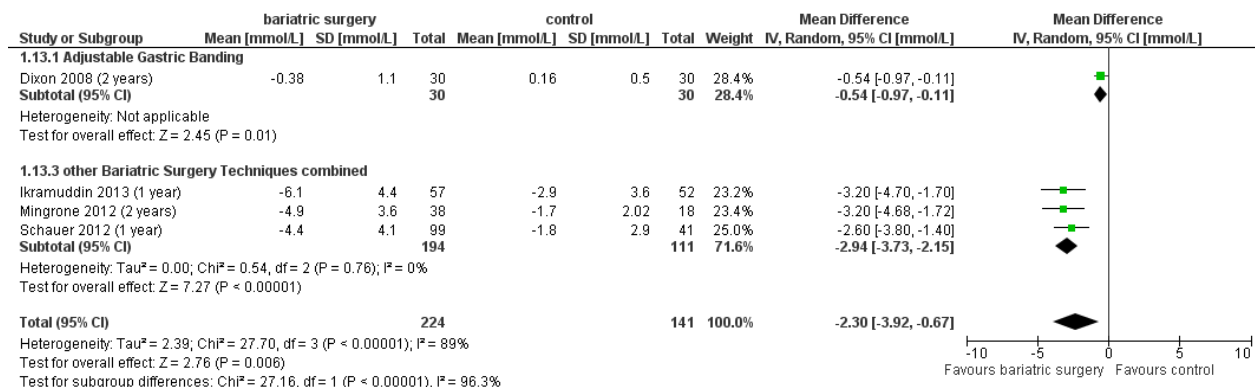

**Appendix Figure 8: Change of fasting glucose level after bariatric surgery versus non-surgical treatment (control) for obesity (diabetics only, subgroups according to AGB versus other bariatric surgery techniques).**

All patients included in the pooled analysis were diabetics at baseline. A subgroup analysis was done for the studies which used AGB versus other bariatric surgery techniques (RYGB, SG or BPD). The conversion factor used from mg/dL to mmol/L was 0.055. Abbreviations: BPD = biliopancreatic diversion, CI = confidence interval, df = degrees of freedom, I<sup>2</sup> = measure of inconsistency (scale: 0 to 100%), IV = Inverse Variance Statistical Method, Random = random effects model, RYGB = Roux-en-Y gastric bypass, SG = sleeve gastrectomy).

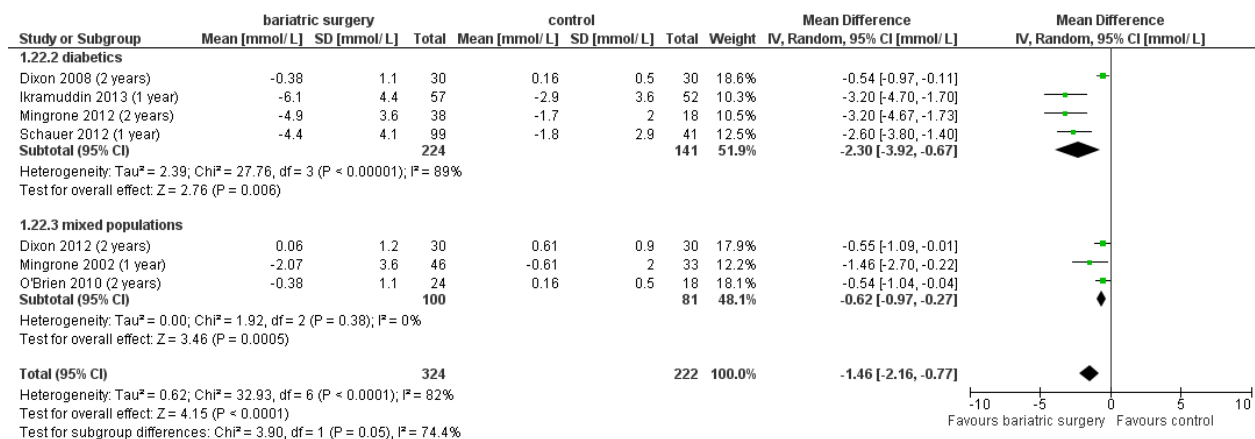

**Appendix Figure 9: Change of fasting glucose levels after bariatric surgery versus non-surgical treatment (control) for obesity (subgroups according to diabetics versus mixed populations).**

Subgroup analysis compared studies which included diabetics only versus mixed populations at baseline. The conversion factor used from mg/dL to mmol/L was 0.055. Standard deviations (SD) were imputed for Mingrone 2002 by taking the median SD of the respective groups of the other studies, and from 95% CI for Dixon 2012.

Abbreviations: BPD = biliopancreatic diversion, CI = confidence interval, df = degrees of freedom, I<sup>2</sup> = measure of inconsistency (scale: 0 to 100%), IV = Inverse Variance Statistical Method, Random = random effects model, RYGB = Roux-en-Y gastric bypass, SG = sleeve gastrectomy).

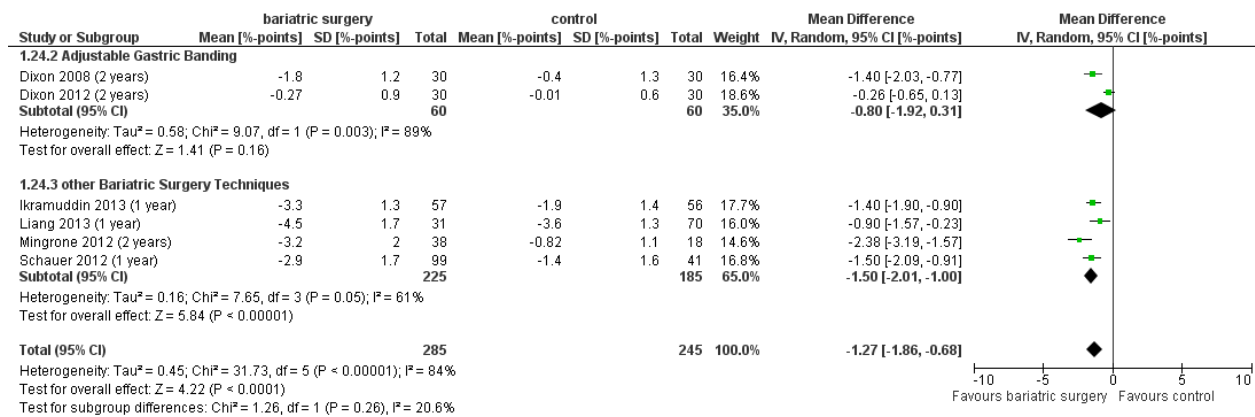

**Appendix Figure 10: Change of glycated HbA1c after bariatric surgery versus non-surgical treatment (control) for obesity (subgroups according to AGB versus other bariatric surgery techniques).**

A subgroup analysis was done for the studies which used AGB other bariatric surgery techniques (RYGB, SG, or BPD). Standard deviations (SD) were derived from p-value for Liang 2013 and from 95% CI for Dixon 2012. Abbreviations: BPD = biliopancreatic diversion, CI = confidence interval, df = degrees of freedom, I<sup>2</sup> = measure of inconsistency (scale: 0 to 100%), IV = Inverse Variance Statistical Method, Random = random effects model, RYGB = Roux-en-Y gastric bypass, SG = sleeve gastrectomy).
